# Supplementary material for: Clinical Staging and Genetic Profiling of Korean Patients with Primary Lymphedema Using Whole-Exome Sequencing: Preliminary Results
Source: Research Square preprint supplement (doi:10.21203/rs.3.rs-1299738/v1), 2022-02-02
Supplement: Supplementary file 1 [file a762df681a74d4162663cc34.xlsx]

## Sheet: Sheet1
Case	Age/Sex	Gene	Transcript	DNA variants	Protein alteration	Zygosity	Classification	Clinical Staging	Location of edema
1	39/F	CELSR1	NM_014246.3	c.8446C>T	p.Gln2816*	Heterozygous	Likely pathogenic	3	bilateral arm & leg
		CELSR1	NM_014246.3	c.8871_8872del	p.Cys2957*	Heterozygous	VUS	3	bilateral arm & leg
2	30/M	CELSR1	NM_014246.3	c.2017G>A	p.Val673Met	Heterozygous	VUS	3	left leg
3	67/F	CELSR1	NM_014246.3	c.8446C>T	p.Gln2816*	Heterozygous	Likely pathogenic	1	bilateral arm & leg
4	26/F	MPI	NM_001289155.2	c.13C>T	p.Arg5*	Heterozygous	Likely pathogenic	2	right leg
		TIE1	NM_005424.5	c.1097C>T	p.Thr366Met	Heterozygous	VUS
		FLT4	NM_001354989.2	c.3178C>T	p.Arg1060Trp	Heterozygous	VUS
		PIEZO1	NM_001142864.4	c.5590C>T	p.Arg1864Cys	Heterozygous	VUS
5	62/M	SOS1	NM_005633.4	c.3391+1G>C	p.?	Heterozygous	VUS	3	bilateral leg
6	27/F	CELSR1	NM_014246.3	c.5642G>A	p.Cys1881Tyr	Heterozygous	VUS	3	left leg
7	39/F	MET	NM_001127500.3	c.2962C>T	p.Arg988Cys	Heterozygous	VUS	1	right arm
8	78/F	PIEZO1	NM_001142864.4	c.6469_6470delinsGT	p.Lys2157Val	Heterozygous	VUS	3	left leg
