# Supplementary material for: Clinical Staging and Genetic Profiling of Korean Patients with Primary Lymphedema Using Whole-Exome Sequencing: Preliminary Results
Source: Research Square preprint supplement (doi:10.21203/rs.3.rs-1299738/v1), 2022-02-02
Supplement: Supplementary file 3 [file ef94353805e8fe8de67b02e5.xlsx]

## Sheet: Sheet1
		Number	Percentage (%)
Patients		27
Sex	Male	9	0.33
	Female	18	0.67
Age (range)		35.6 ± 27.8 (1-77)
Initial symptom age	Congenital	2	0.07
	< 10 years	2	0.07
	10 - 20 years	4	0.15
	20 - 40 years	11	0.41
	> 40 years	7	0.26
Location	Unilateral leg	18	0.67
	bilateral leg	4	0.15
	Unilateral arm	3	0.11
	bilateral arm	2	0.07
	others	1(face)	0.03
Lymphedema stage	1	3	0.11
	2	10	0.37
	3	14	0.51
ICG stage	0	0	0
	1	2	0.07
	2	1	0.04
	3	3	0.11
	4	15	0.56
	5	7	0.26
Lymphoscintigraphy stage	0	0	0
	1	0	0
	2	0	0
	3	0	0
	4	3	0.11
	5	15	0.56
	6	9	0.33
